# Supplementary material
Source: PubMed Central journal article supplement (PMC2518237)
Supplement: tpc.108.061150_1.pdf [file tpc.108.061150_1.pdf]

Supplemental Data. Zhang et al. (2008). Dolichol Biosynthesis and Its Effects on the Unfolded Protein Response and Abiotic Stress Resistance in *Arabidopsis*.

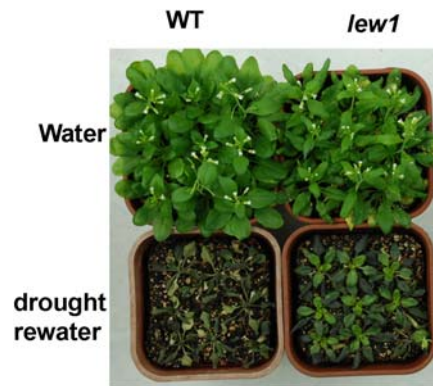

**Supplemental Figure 1.** Phenotypes of *lew1* and wild type under drought treatment after rewatering. 10-day-old seedlings in soil were subjected to water withholding for 22d. The upper were control plants in normal growth conditions and lower were drought plants after rewatering.

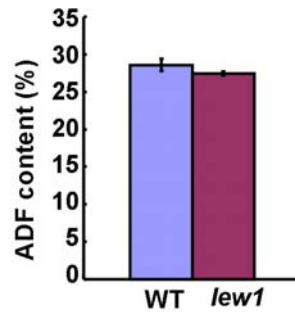

**Supplemental Figure 2.** ADF (Acid Detergent Fiber) contents of *lew1* and wild type. 6-week-old plants were collected and dried in an oven at 60°C overnight and the ADF (Acid Detergent Fiber) content of plants was analyzed according to the described method (ANKOM Technology, Fairport, NY). Briefly, 0.6g sample was transferred to a filter bag which had been weighed. The bag was placed into a container, and enough acetone was poured into the container to cover the bag. The container was shaken 10 times and the sample was allowed to soak for 10 minutes. This was repeated with fresh acetone. The bag was put into a fiber vessel, then 100 mL AD solution (20g cetyltrimethylammonium bromide in 1L 2M H<sub>2</sub>SO<sub>4</sub>) was added. The sample was extracted and washed with 70-90°C water until the pH of extracted solution was neutral. The sample was removed and the bag was dried and weighed. The content of ADF was calculated with the following formula:  $ADF (\%) = (W3 - W1) \times 100 / W2$ ; W1 = bag weight, W2 = Sample weight, W3 = Dried weight of bag with fiber after extraction process. Two duplicated experiments were done.

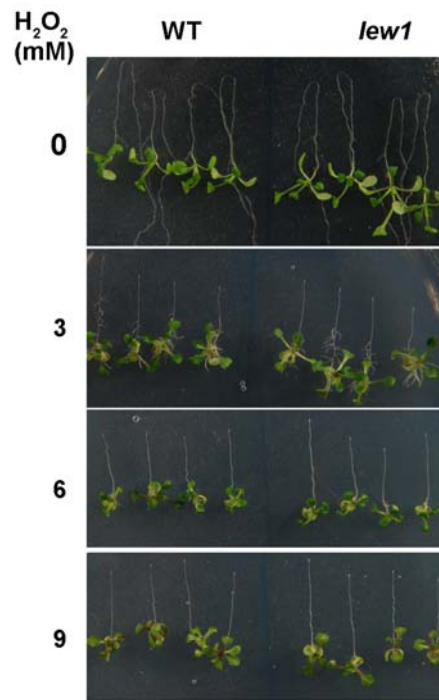

**Supplemental Figure 3.** Comparison of *lew1* and wild type on  $H_2O_2$  medium. 4-day seedlings were moved to MS medium containing different concentrations of  $H_2O_2$ , and cultured for 10 days.
